# Supplementary material for: Attributing ozone and its precursors to land transport emissions in Europe and Germany
Source: Copernicus journal article supplement (doi:10.5194/acp-20-7843-2020), 2020-07-06
Supplement: Supplementary file 1 [file acp-20-7843-2020-supplement.zip]

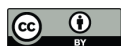

*Supplement of*

## **Attributing ozone and its precursors to land transport emissions in Europe and Germany**

**Mariano Mertens et al.**

*Correspondence to:* Mariano Mertens (mariano.mertens@dlr.de)

- acp-20-7843-2020-supplement-title-page.pdf
- mechanism\_mecca.pdf
- mechanism\_scav.pdf
- setups
  - RC1-base-eu07\_wl-qctm\_2w\_REF.zip
  - RC1-base-eu07\_wl-sen1\_qctm\_2w\_EVEU.zip
- supplement.pdf

The copyright of individual parts of the supplement might differ from the CC BY 4.0 License.
